# Supplementary material for: Problem-based shared decision-making in diabetes care: a secondary analysis of video-recorded encounters
Source: HighWire-hosted journal article supplement (doi:10.1136/bmjebm-2022-112067), 2023-03-02
Supplement: bmjebm-2022-112067supp001_data_supplement.pdf [file bmjebm-2022-112067supp001_data_supplement.pdf]

## Supplement 1. Coding scheme and manual

Desires

4. Number of desire:
5. Time of stated desire:
6. Stated by: patient/clinician
7. Who initiated the comment on desires?

|                          |                        |
|--------------------------|------------------------|
| <input type="checkbox"/> | Patient <sub>1</sub>   |
| <input type="checkbox"/> | Clinician <sub>2</sub> |

Explain: \_\_\_\_\_(write in text)

8. What was the desire about? (more than one may apply)

|                          |                                                                                                                     |
|--------------------------|---------------------------------------------------------------------------------------------------------------------|
| <input type="checkbox"/> | An option <sub>1</sub><br><i>(medication or lifestyle)</i>                                                          |
| <input type="checkbox"/> | A personal want/disposition <sub>2</sub><br><i>(e.g. I don't like needles, I'm not giving up my glass of wine )</i> |
| <input type="checkbox"/> | A situation <sub>3</sub><br><i>(e.g. we've got to do something about all the hypos you've been having)</i>          |
| <input type="checkbox"/> | Integrity of self <sub>4</sub><br><i>(e.g. I wish I wasn't like this, It's good—I'm figuring this out)</i>          |
| <input type="checkbox"/> | Other <sub>5</sub> _____ (write in text)                                                                            |

Utterance (entire quote): \_\_\_\_\_(write in text)

SDM

9. State which steps of SDM you encountered during the consultation video in chronological order.  
Choose from: choice awareness (1), providing information (2), deciding on final treatment (3)

| Step of SDM | Starting time | Citation |
|-------------|---------------|----------|
|             |               |          |
|             |               |          |
|             |               |          |
|             |               |          |
|             |               |          |
|             |               |          |
|             |               |          |

10. Which forms of SDM did you see? (see table 1 and 2 listed below) Multiple forms of SDM are possible during one consultation. Please enter forms in chronological order during the conversation. Choose from no form of SDM to be defined (0), weighing treatment alternatives (1), negotiating conflicting desires (2), solving problematic situations (3) and developing existential insight (4).

| Form of SDM | Starting time | Citation |
|-------------|---------------|----------|
|             |               |          |
|             |               |          |
|             |               |          |
|             |               |          |
|             |               |          |
|             |               |          |
|             |               |          |

**Supplementary table 1. Patient characteristics per study arm.**

| Patient demographics             | Intervention (n=69) | Control (n=31) | p-value |
|----------------------------------|---------------------|----------------|---------|
| Age, years (mean, SD)            | 59 (9)              | 63 (10)        | 0.03    |
| Gender, female (n, %)            | 25 (36)             | 16 (52)        | 0.15    |
| BMI (mean, SD)                   | 36.3 (9.6)          | 37.5 (8.3)     | 0.30    |
| Race (n, %)                      |                     |                | 0.83    |
| White                            | 58 (84)             | 27 (87)        |         |
| Black                            | 7 (10)              | 2 (6.5)        |         |
| Other                            | 4 (6)               | 2 (6.5)        |         |
| Education (n, %)                 |                     |                | 0.87    |
| High School or less              | 20 (36)             | 9 (31)         |         |
| Vocational/4 year college degree | 29 (53)             | 17 (59)        |         |
| Graduate degree                  | 6 (11)              | 3 (10)         |         |
| HbA1c, % (mean, SD)              | 8.9 (1.3)           | 9.0 (1.2)      | 0.53    |
| Years with diabetes (n, %)       |                     |                | 0.30    |
| <5                               | 20 (33)             | 7 (24)         |         |
| 5 to <10                         | 23 (38)             | 9 (31)         |         |
| >10                              | 17 (28)             | 13 (45)        |         |
| Literacy (n, %)                  |                     |                | 0.17    |
| Inadequate                       | 8 (13)              | 1 (4)          |         |
| Adequate                         | 54 (87)             | 27 (96)        |         |

BMI: body mass index; HbA1c: glycated hemoglobin; SD: standard deviation. The intervention consisted of the use of a within-encounter conversation aid. P-value <0.05 is considered statistically significant.

**Supplementary table 2. Number of desires voiced per study arm.**

| Number of desires voiced | Study arm    |           | Total |
|--------------------------|--------------|-----------|-------|
|                          | Intervention | Control   |       |
| 0                        | 11 (15.94)   | 6 (19.35) | 17    |
| 1                        | 14 (20.29)   | 9 (29.03) | 23    |
| 2                        | 12 (17.39)   | 2 (6.45)  | 14    |
| 3                        | 11 (15.94)   | 8 (25.81) | 19    |
| 4                        | 11 (15.94)   | 1 (3.23)  | 12    |
| 5                        | 3 (4.35)     | 2 (6.45)  | 5     |
| 6                        | 2 (2.90)     | 3 (9.68)  | 5     |
| 7                        | 4 (5.80)     | 0 (0.00)  | 4     |
| 8                        | 1 (1.45)     | 0 (0.00)  | 1     |
| Total                    | 69           | 31        | 100   |

The intervention consisted of the use of a within-encounter conversation aid.

**Supplementary table 3. Type of desire stated by patient or clinician per study arm.**

| Desire                | Study arm    |          | p-value |
|-----------------------|--------------|----------|---------|
|                       | Intervention | Control  |         |
| Overall               |              |          | 0.07    |
| Patient               | 107 (60%)    | 50 (72%) |         |
| Clinician             | 71(40%)      | 19 (28%) |         |
| Medication/Lifestyle  |              |          | 0.03    |
| Patient               | 18 (29%)     | 10 (56%) |         |
| Clinician             | 45 (71%)     | 8 (44%)  |         |
| Personal want         |              |          | 0.89    |
| Patient               | 65 (74%)     | 33 (75%) |         |
| Clinician             | 23 (26%)     | 11 (25%) |         |
| Problematic situation |              |          | >0.99   |
| Patient               | 20 (87%)     | 4 (100%) |         |
| Clinician             | 3 (13%)      | 0 (0%)   |         |
| Integrity of self     |              |          | ~       |
| Patient               | 4 (100%)     | 3 (100%) |         |
| Clinician             | 0 (0%)       | 0 (0%)   |         |

The intervention consisted of the use of a within-encounter conversation aid. P-value <0.05 is considered statistically significant.

Supplementary figure 1. Association OPTION12 score and weighing of alternatives per study arm.

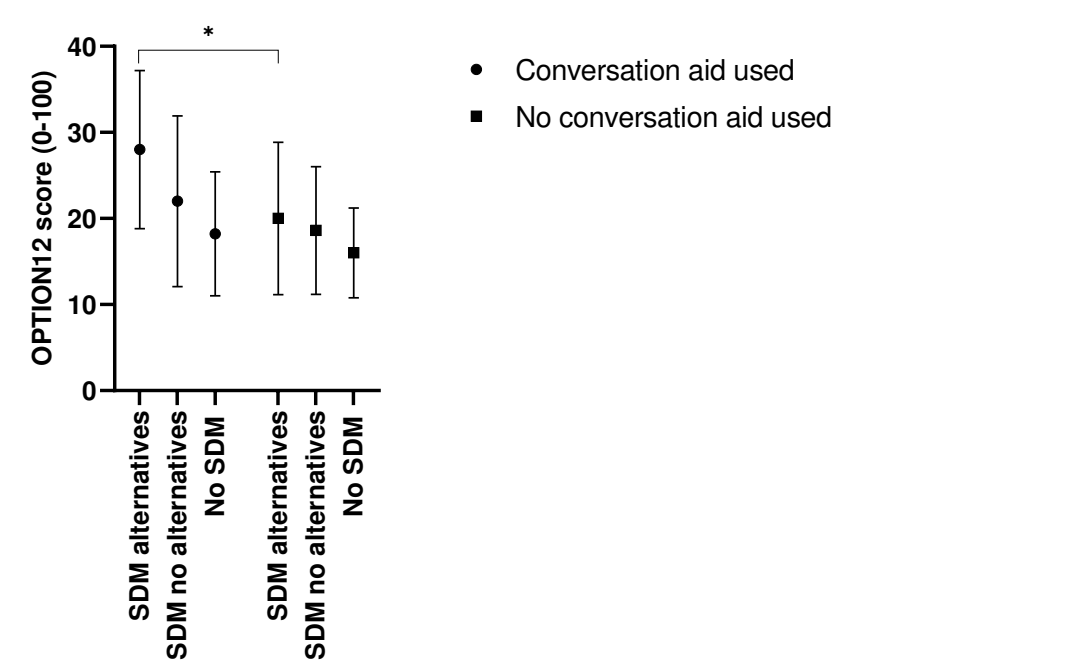

CA: conversation aid; SDM: shared decision making. Figures represent means, bars represent standard deviations. Dots: consultations in which a within-conversation aid was used. Squares: consultations in which no within-conversation aid was used. SDM alternatives; consultations in which SDM was present and focused on weighing alternatives solely or as part of multiple forms of SDM used (CA: n=42, no CA: n=10). SDM no alternatives; consultations in which SDM was present but not focused on weighing alternatives (CA: n=18, no CA: n=15). No SDM; consultations in which no form of SDM was observed (CA: n=8, no CA: n=6). OPTION12 score: score measuring the clinician’s efforts to involve a patient within a consultation. Scores range from 0 to 100, with higher scores indicating more aspects of SDM present. \*p-value<0.05.

Supplementary figure 2. Overview of forms of SDM used and desires voiced by patients and clinicians per consultation.

X-axis represents the percentage of time of the encounter. Consultations are ordered by the amount of SDM instances observed during the encounter, with no instance of SDM at the top to six instances of SDM at the bottom. Colors represent the different forms of SDM. Only the start of an SDM instance was coded, since a clear end could often not be distinguished. Desires voiced during the encounter are indicated by a P for desires voiced by the patient or C for a desire voiced by the clinician and further characterized as focused towards 1) an option, 2) a personal want/disposition, 3) a situation or 4) integrity of self.
