# Supplementary figures and images for: Problem-based shared decision-making in diabetes care: a secondary analysis of video-recorded encounters
Source: HighWire-hosted journal article supplement (doi:10.1136/bmjebm-2022-112067), 2023-03-02

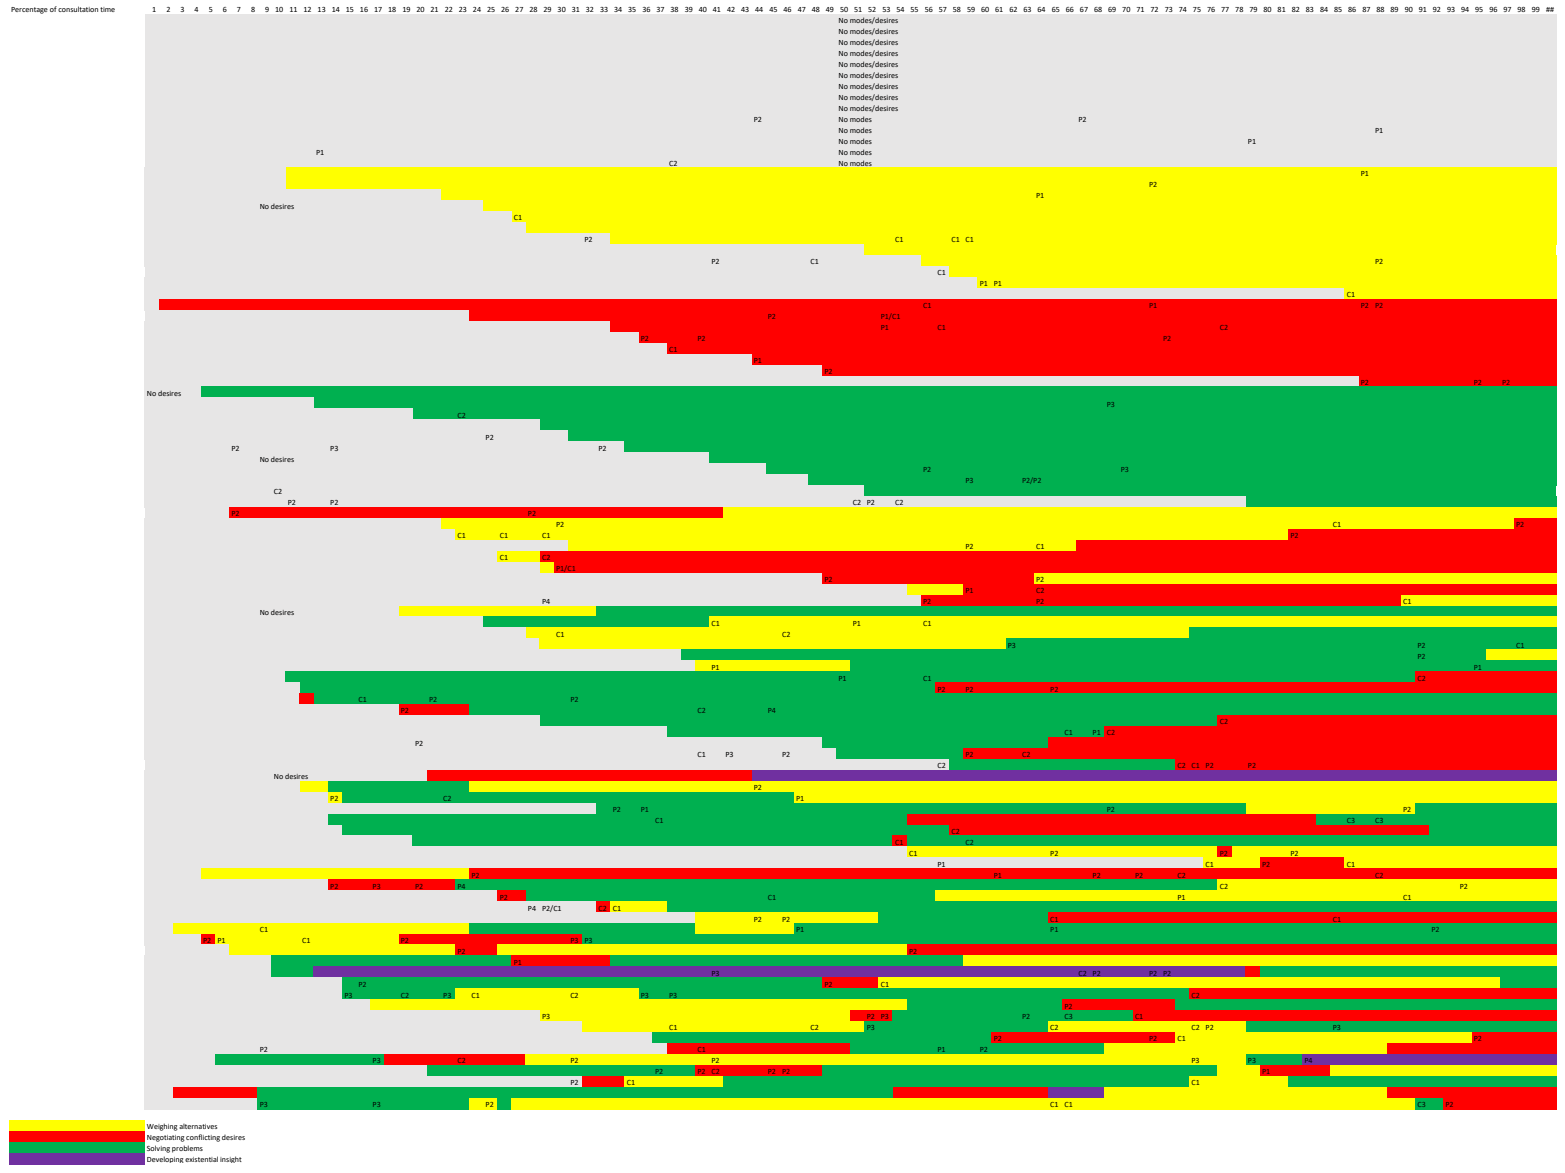

Supplement: bmjebm-2022-112067supp002_data_supplement.pdf [file bmjebm-2022-112067supp002_data_supplement.pdf]
